# Supplementary material
Source: publisher figshare collection journal article supplement (https://aacr.figshare.com/articles/dataset/_/22365111)

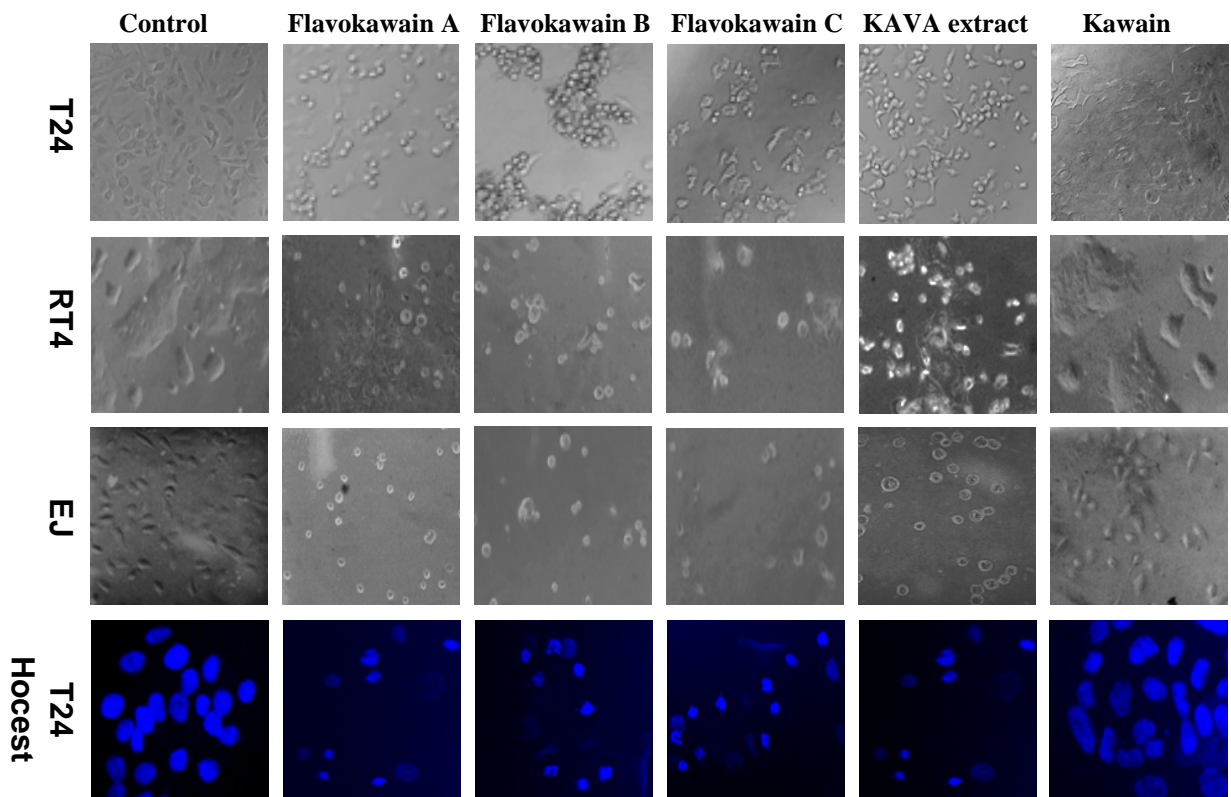

Zi and Simoneau, Figure S1

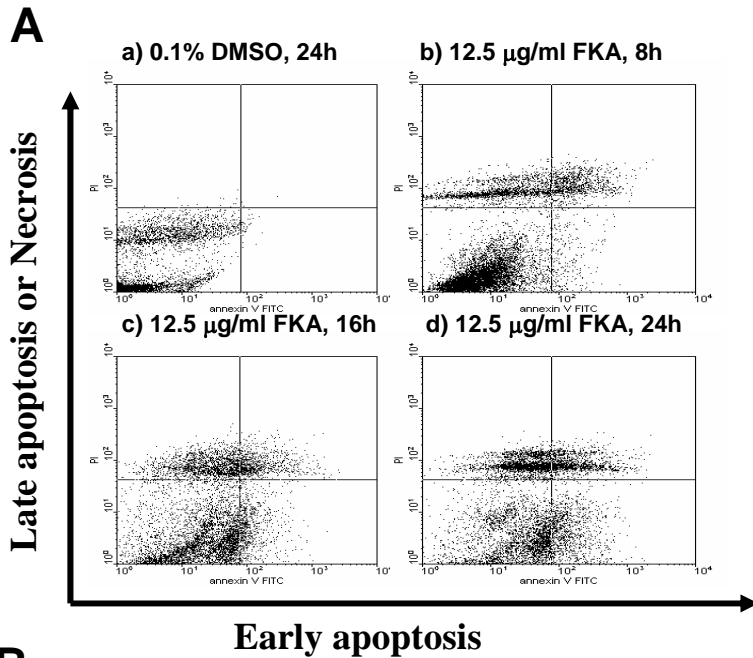

**B**

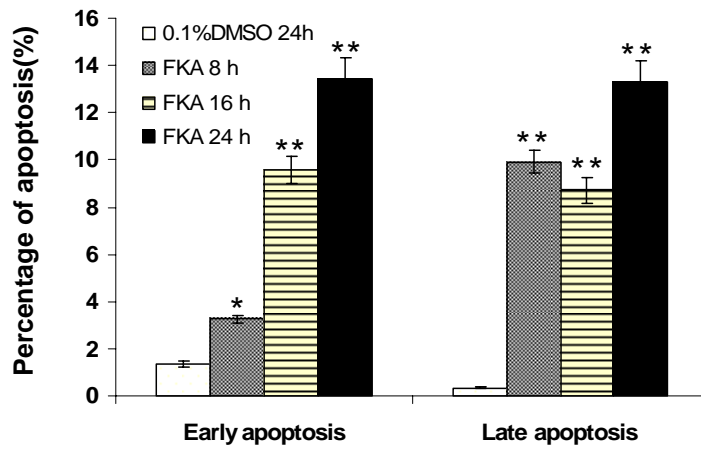

**C**

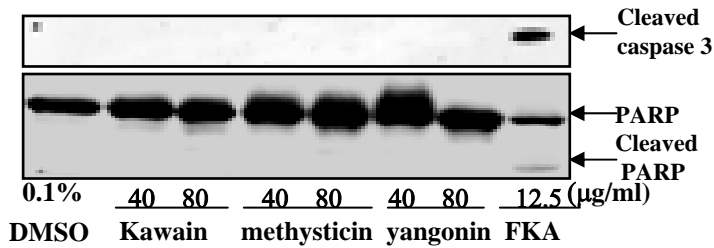

Zi and Simoneau, Figure S2

Supplement: Supplementary file 1 [file 39809379]
